# Supplementary material for: Oxidative dissolution mechanism of both undoped and Gd2O3-doped UO2(s) at alkaline to hyperalkaline pH
Source: Royal Society of Chemistry journal article supplement (doi:10.1039/d3dt01268a), 2023-01-01
Supplement: d3dt01268a1.pdf [file d3dt01268a1.pdf]

1 **Supplementary material**

2 **Oxidative dissolution mechanism of both undoped and Gd<sub>2</sub>O<sub>3</sub>-doped UO<sub>2</sub>(s) at alkaline to hyperalkaline**  
3 **pH**

4

5 Sonia García-Gómez<sup>a\*</sup>, Javier Giménez<sup>a</sup>, Ignasi Casas<sup>a</sup>, Jordi Llorca<sup>a</sup>, Joan De Pablo<sup>a,b</sup>

6

7 <sup>a</sup>Department of Chemical Engineering, EEBE and Barcelona Research Center in Multiscale Science and Engineering, Universitat Politècnica de  
8 Catalunya (UPC), 08019 Barcelona, Spain.

9 <sup>b</sup>EURECAT, Centre Tecnològic de Catalunya, 08243 Manresa, Spain

10

11 Corresponding author: \*[sonia.garcia.gomez@upc.edu](mailto:sonia.garcia.gomez@upc.edu)

12 **S1. Characterization of Gd<sub>2</sub>O<sub>3</sub>-UO<sub>2</sub> samples**

13

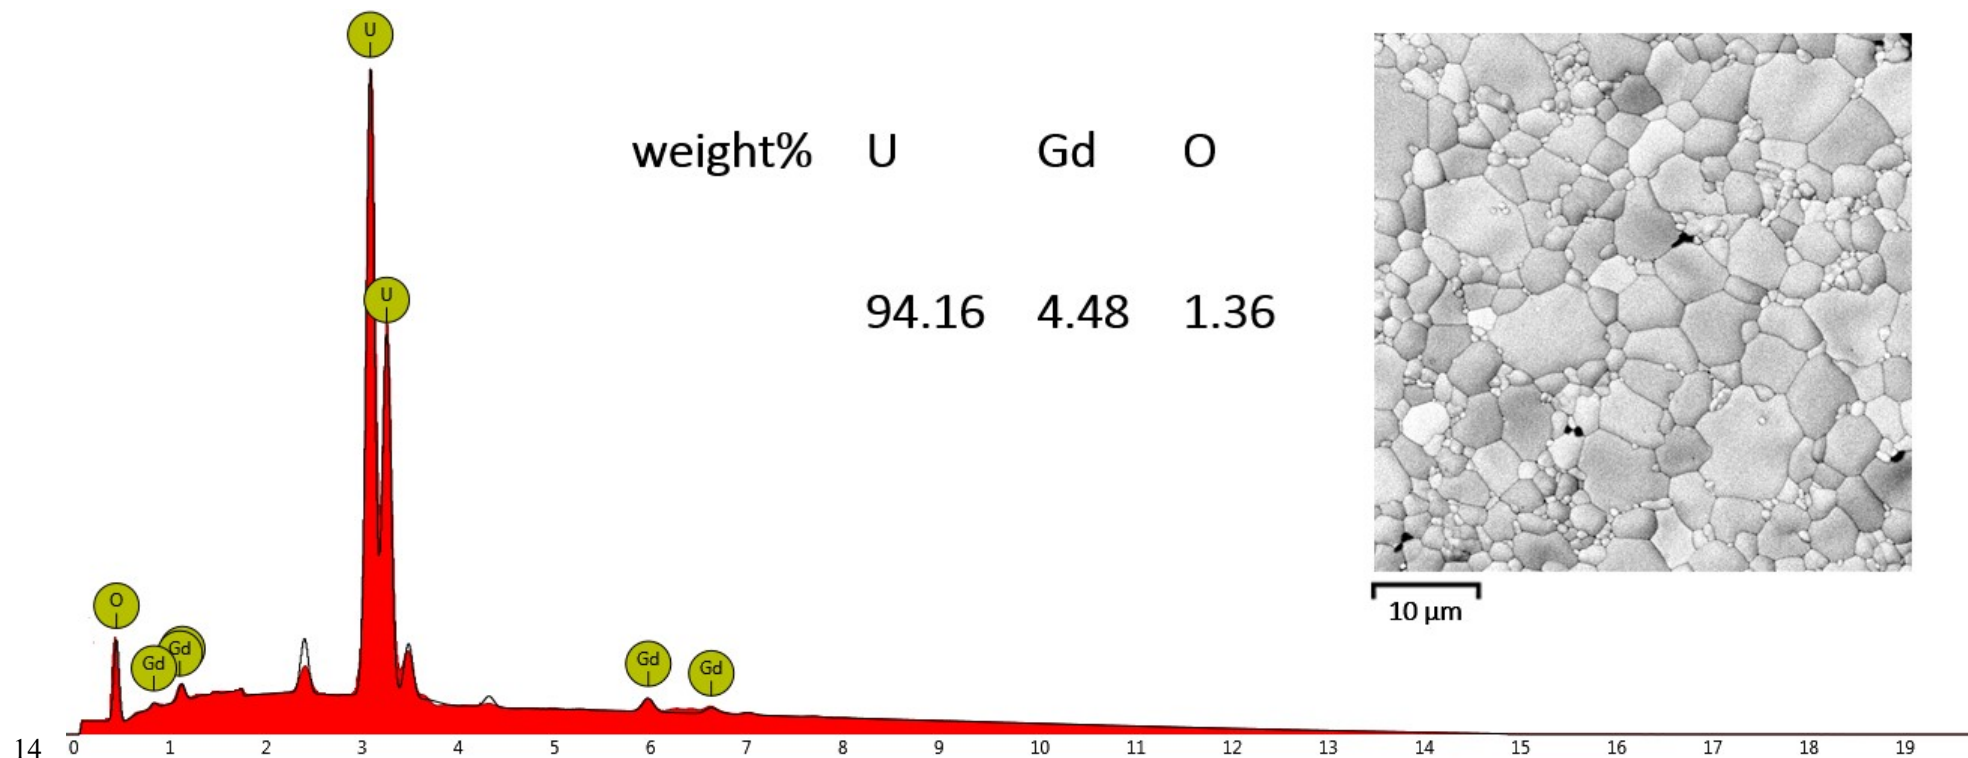

14

15

**Figure S1.** Scanning electron micrograph and energy dispersive X-ray spectrum of UO<sub>2</sub> doped with 5% wt. of Gd<sub>2</sub>O<sub>3</sub> after sintering.

16

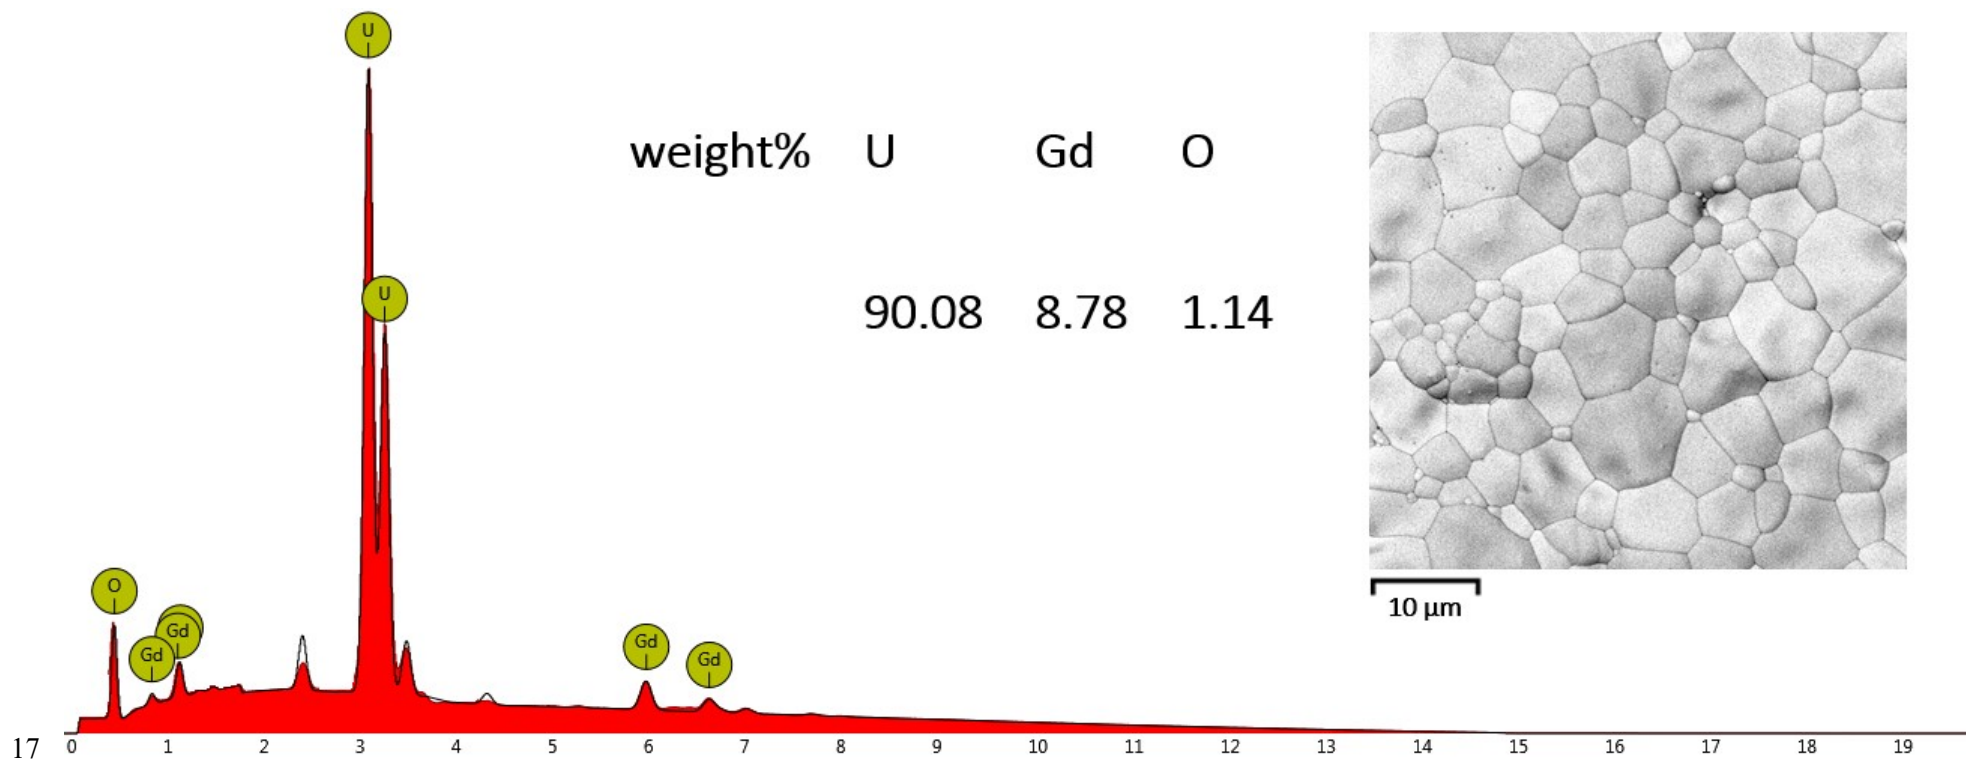

**Figure S2.** Scanning electron micrograph and energy dispersive X-ray spectrum of  $\text{UO}_2$  doped with 10% wt. of  $\text{Gd}_2\text{O}_3$  after sintering.

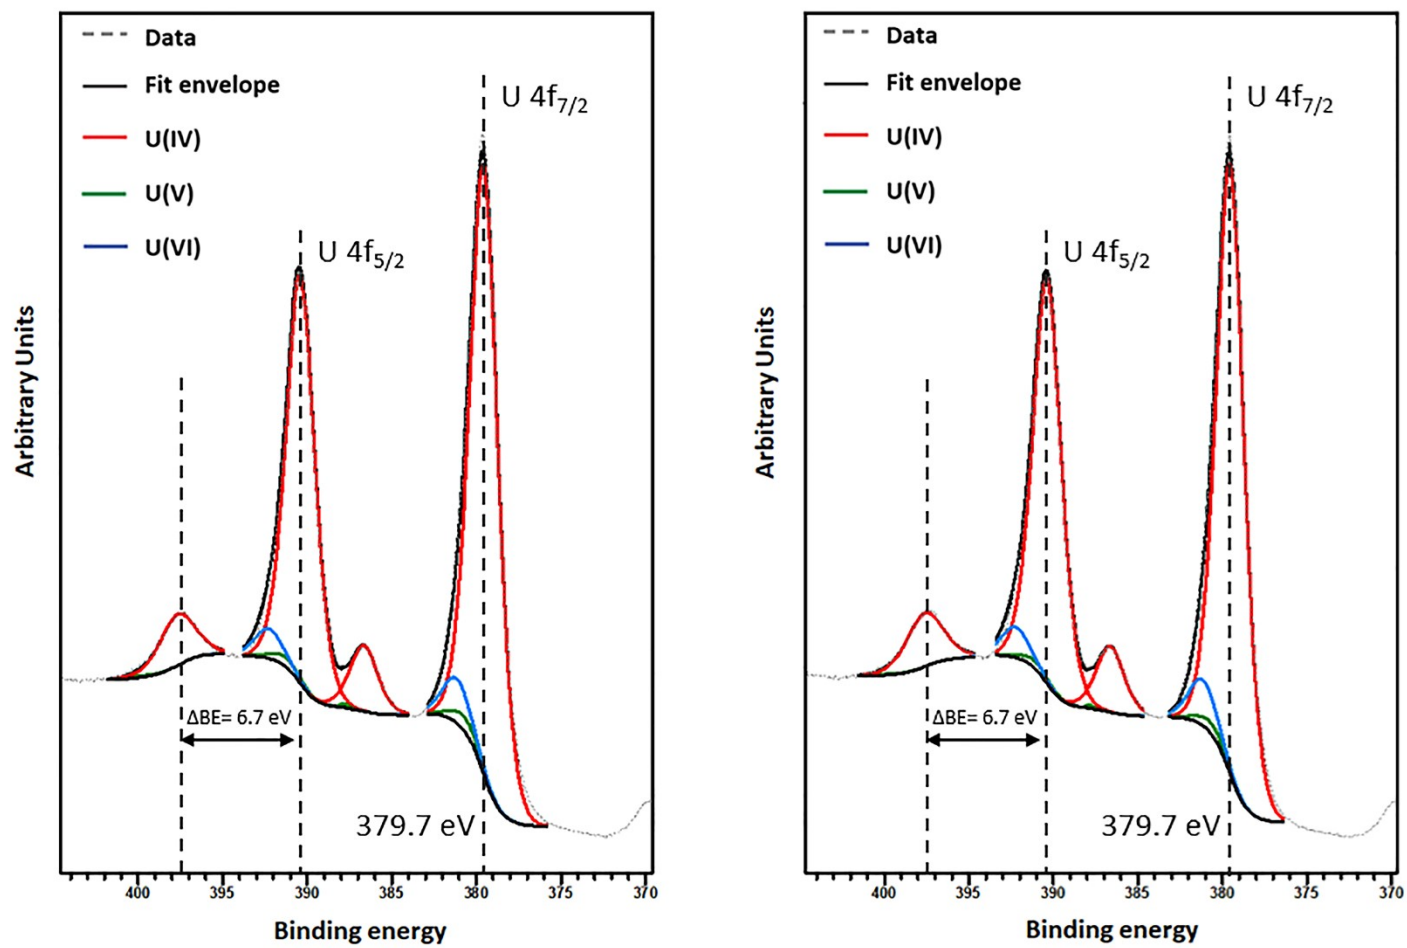

22

23 **Figure S3.** U4f<sub>5/2</sub> and U4f<sub>7/2</sub> regions of the XPS spectra corresponding to the samples doped with 5% wt. of Gd<sub>2</sub>O<sub>3</sub> (left) and doped with 10% wt. of Gd<sub>2</sub>O<sub>3</sub> (right)

24

after sintering. Both spectra exhibited the characteristic spectrum of UO<sub>2</sub>
